# Supplementary material for: Lewis acid-activated oxidation of alcohols by permanganate
Source: Royal Society of Chemistry journal article supplement (doi:10.1039/c1cc12024g), 2011-01-01
Supplement: c1cc12024g.pdf [file c1cc12024g.pdf]

## Electronic Supplementary Information

### Lewis acid-Activated Oxidation of Alcohols by Permanganate

Hongxia Du,<sup>a,b</sup> Po-Kam Lo,<sup>b</sup> Zongmin Hu,<sup>a,b,c</sup> Haojun Liang,<sup>\*a,c</sup> Kai-Chung Lau,<sup>\*b</sup> Yi-Ning Wang,<sup>b</sup> William W. Y. Lam<sup>b</sup> and Tai-Chu Lau<sup>\*b,c</sup>

<sup>a</sup>*CAS Key Laboratory of Soft matter Chemistry, University of Science and Technology of China, Hefei, Anhui 230026, P.R. China*

<sup>b</sup>*Department of Biology and Chemistry, City University of Hong Kong, Tat Chee Avenue, Kowloon, Hong Kong, P.R. China. Institute of Molecular Functional Materials*

<sup>c</sup>*Advanced Laboratory of Environmental Research and Technology(ALERT), Joint Advanced Research Center, USTC-CityU, Suzhou, Jiangsu215124, P.R. China*

## 1. Materials

Caution: Care should be taken in handling Lewis acid/ $\text{MnO}_4^-$  in organic solvents, since the system is very reactive. Although we have not encountered any problems so far, the amount of  $\text{KMnO}_4$  used each time should be less than 50 mg. Potassium permanganate (Ajax Chemicals, AR) was used as received. Boron trifluoride acetonitrile complex solution ( $\text{BF}_3 \cdot \text{CH}_3\text{CN}$ ) (Sigma, 15-18%) was stored at  $-20^\circ\text{C}$  and was used without further purification. Scandium (III) triflate (Aldrich, 99%), calcium trifluoromethanesulfonate (Aldrich, 99.9%), zinc trifluoromethanesulfonate (Sigma-Aldrich, 98%), and barium trifluoromethanesulfonate (Aldrich, 98%) were stored in dry box and used without further purification. Methanol (Mecker, 99.9%), ethanol (Mecker, 99.9%), 2-propanol (sigma, 98%), cyclohexanol (Sigma, 99%), cyclobutanol (Aldrich, 99%), 2-heptanol (Riedel-deHaën, 98%), 1-heptanol (Aldrich, 98%), benzyl alcohol (Sigma, 99%), 1-phenylethanol (Aldrich, 98%), 4-chlorobenzyl alcohol (Riedel-deHaën, 99%) were used as received. Acetonitrile (Mecker, 99.9%) was stirred overnight with  $\text{KMnO}_4$  and then distilled; it was distilled again over  $\text{CaH}_2$  under argon.<sup>1</sup>

## 2. Product analysis

The organic products resulting from the oxidation of alcohols by  $\text{BF}_3 \cdot \text{CH}_3\text{CN}$  were determined as followed. A solution of  $\text{BF}_3 \cdot \text{CH}_3\text{CN}$  (0.12 mmol) in  $\text{CH}_3\text{CN}$  was added with vigorous stirring to a solution of  $\text{KMnO}_4$  ( $8 \times 10^{-3}$  mmol) in  $\text{CH}_3\text{CN}$  containing a

known amount of alcohol (0.8 mmol). After 15 min 100  $\mu\text{L}$  of  $\text{H}_2\text{O}$  were added to quench the reaction, and the resulting mixture was analyzed by GC and GC-MS using chlorobenzene as the internal standard. A Hewlett-Packard 5890 gas chromatograph with a DB-FFAP capillary column (30 mm  $\times$  0.25 mm i.d.) was used. GC-MS measurements were carried out on an HP 6890 gas chromatograph interfaced to an HP 5975 mass selective detector.

### 3. Kinetics

The kinetics of the reaction were studied by using a Shimadzu UV1800 spectrophotometer and an Applied Photophysics SX-20 stopped-flow spectrophotometer. The concentrations of the alcohols were at least in 10-fold excess of that of  $\text{MnO}_4^-$ . Reactions were initiated by mixing a freshly prepared solution of  $\text{KMnO}_4$  in  $\text{CH}_3\text{CN}$  with Lewis acid and alcohols in  $\text{CH}_3\text{CN}$ . The reaction progress was monitored by observing absorbance changes at 526 nm ( $\lambda_{\text{max}}$  of  $\text{MnO}_4^-$ ). Pseudo-first-order rate constants,  $k_{\text{obs}}$ , were obtained by nonlinear least-squares fits of  $A_t$  vs time  $t$  according to the equation  $A_t = A_f + (A_0 - A_f) \exp(-k_{\text{obs}} t)$ , where  $A_0$  and  $A_f$  are the initial and final absorbances, respectively.

#### 4. Computational Study

The reaction mechanisms for oxidation of methanol and 1-phenyl-ethanol by the  $\text{MnO}_4^-$  and  $\text{BF}_3 \cdot \text{MnO}_4^-$  have been theoretically studied by density functional theory. The structures and energies of all molecular species are calculated at the B3LYP level<sup>2</sup> with the LanL2DZ basis set<sup>3</sup> for transition metal (Mn) and 6-311++G(d,p) basis set for the nonmetal atoms. The polarizable continuum model (PCM)<sup>4</sup> is used to account for the solvent effects in acetonitrile. All calculations are performed with Gaussian 09 package of program.<sup>5</sup> The potential energy surfaces for the oxidation of methanol by  $[\text{MnO}_4]^-$  is shown in **Scheme 1**. As presented in **Schemes 1 to 3**, the optimized structures of the intermediates (INT) and transition states (TS) at gas phase and in solvent medium are fairly similar.

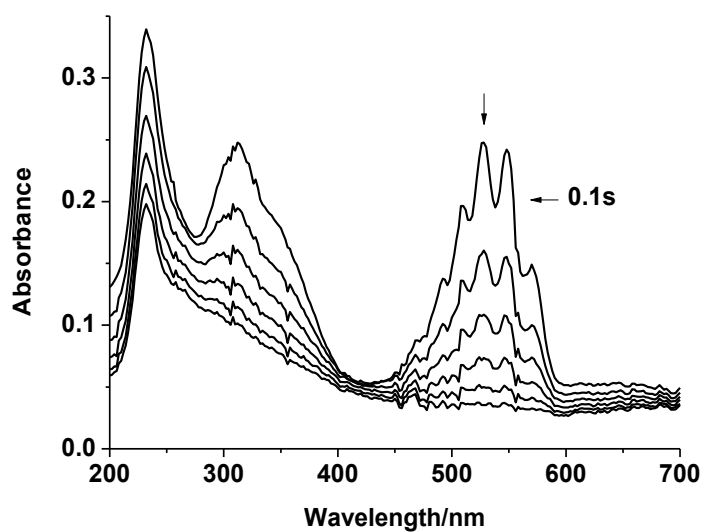

**Fig.S1** Spectrophotometric changes for the  $\text{BF}_3$  ( $4.0 \times 10^{-3}$  M) activated oxidation of  $\text{CH}_3\text{OH}$  ( $1.0 \times 10^{-3}$  M) by  $\text{KMnO}_4$  ( $1.0 \times 10^{-4}$  M) at 1 s intervals

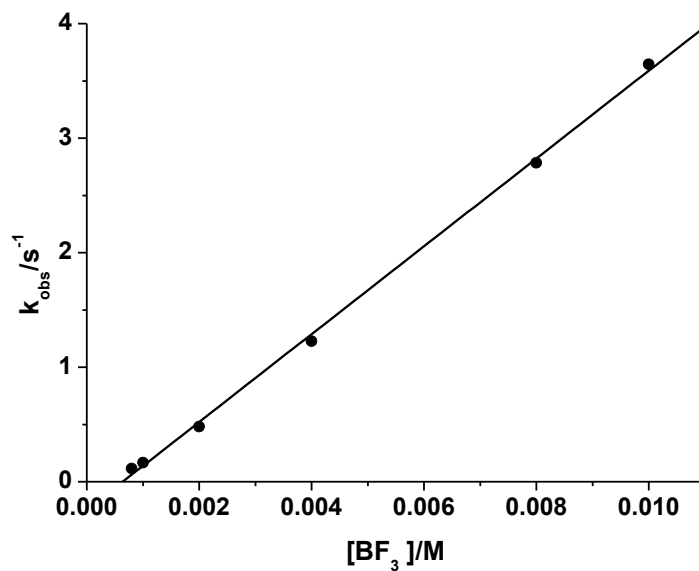

**Fig.S2** Plot of  $k_{\text{obs}}$  vs  $[\text{BF}_3]$  for the  $\text{BF}_3$  activated oxidation of  $\text{CH}_3\text{OH}$  by  $\text{KMnO}_4$  ( $1.0 \times 10^{-4}$  M) at 298.0 K ( $[\text{KMnO}_4] = 1.0 \times 10^{-4}$  M,  $[\text{CH}_3\text{OH}] = 1.0 \times 10^{-2}$  M, slope =  $(3.83 \pm 0.07) \times 10^2$ , y-intercept =  $-(2.45 \pm 0.37) \times 10^{-1}$ ,  $r = 0.998$ )

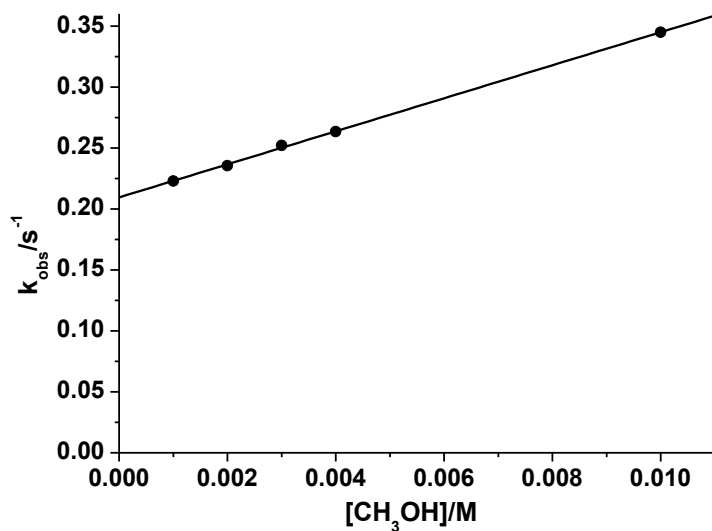

**Fig.S3** Plot of  $k_{\text{obs}}$  vs  $[\text{CH}_3\text{OH}]$  for the for the  $\text{Sc}(\text{CF}_3\text{SO}_3)_3$  ( $1.0 \times 10^{-3}$  M) activated oxidation of  $\text{CH}_3\text{OH}$  by  $\text{KMnO}_4$  ( $1.0 \times 10^{-4}$  M) at 298.0 K (slope =  $(1.35 \pm 0.02) \times 10^1$ , y-intercept =  $(2.09 \pm 0.00) \times 10^{-1}$ ,  $r = 0.999$ )

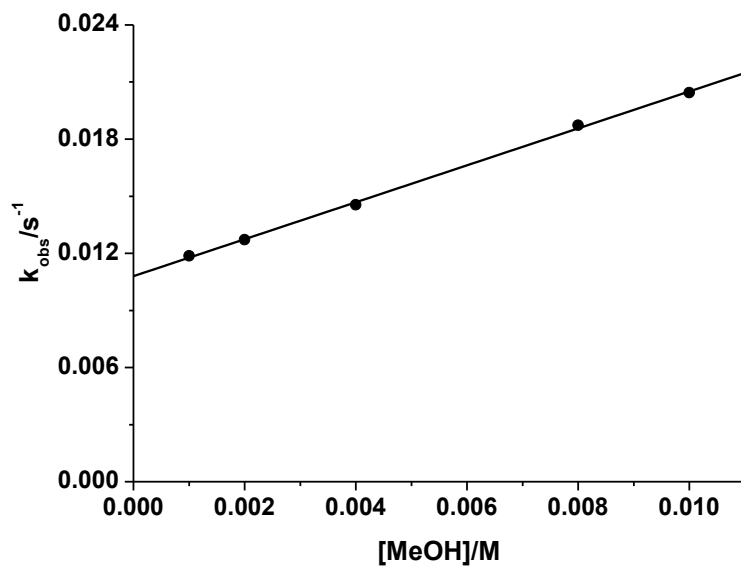

**Fig.S4** Plot of  $k_{\text{obs}}$  vs  $[\text{CH}_3\text{OH}]$  for the  $\text{Zn}(\text{CF}_3\text{SO}_3)_2$  ( $1.0 \times 10^{-3}$  M) activated oxidation of  $\text{CH}_3\text{OH}$  by  $\text{KMnO}_4$  ( $1.0 \times 10^{-4}$  M) at 298.0 K (slope =  $(9.71 \pm 0.18) \times 10^{-1}$ , y-intercept =  $(1.08 \pm 0.01) \times 10^{-2}$ ,  $r = 0.999$ )

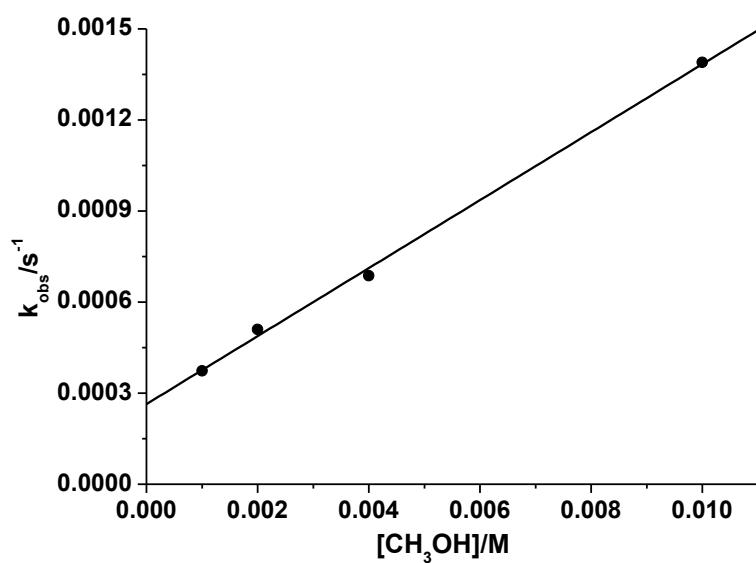

**Fig.S5** Plot of  $k_{\text{obs}}$  vs  $[\text{CH}_3\text{OH}]$  for the  $\text{Ca}(\text{CF}_3\text{SO}_3)_2$  ( $1.0 \times 10^{-3}$  M) activated oxidation of  $\text{CH}_3\text{OH}$  by  $\text{KMnO}_4$  ( $1.0 \times 10^{-4}$  M) at 298.0 K (slope =  $(1.12 \pm 0.03) \times 10^{-1}$ , y-intercept =  $(2.64 \pm 0.19) \times 10^{-4}$ ,  $r = 0.997$ )

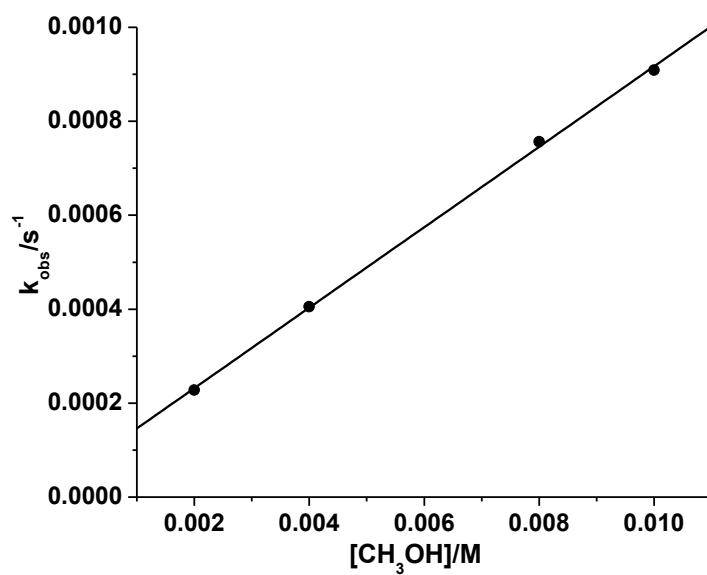

**Fig.S6** Plot of  $k_{\text{obs}}$  vs  $[\text{CH}_3\text{OH}]$  for the  $\text{Ba}(\text{CF}_3\text{SO}_3)_2$  ( $1.0 \times 10^{-3}$  M) activated oxidation of  $\text{CH}_3\text{OH}$  by  $\text{KMnO}_4$  ( $1.0 \times 10^{-4}$  M) at 298.0 K (slope =  $(8.57 \pm 0.16) \times 10^{-2}$ , y-intercept =  $(6.04 \pm 1.08) \times 10^{-5}$ ,  $r = 0.999$ )

**Scheme S1:** Singlet and triplet potential energy surface for the oxidation of methanol by  $\text{MnO}_4^-$  at B3LYP level using LanL2DZ basis set for transition metal (Mn) and 6-311++G(d,p) basis set for nonmetal atoms. Relative 298 K Gibbs free energies at gas phase and in acetonitrile (in parentheses) are given in kcal/mol.

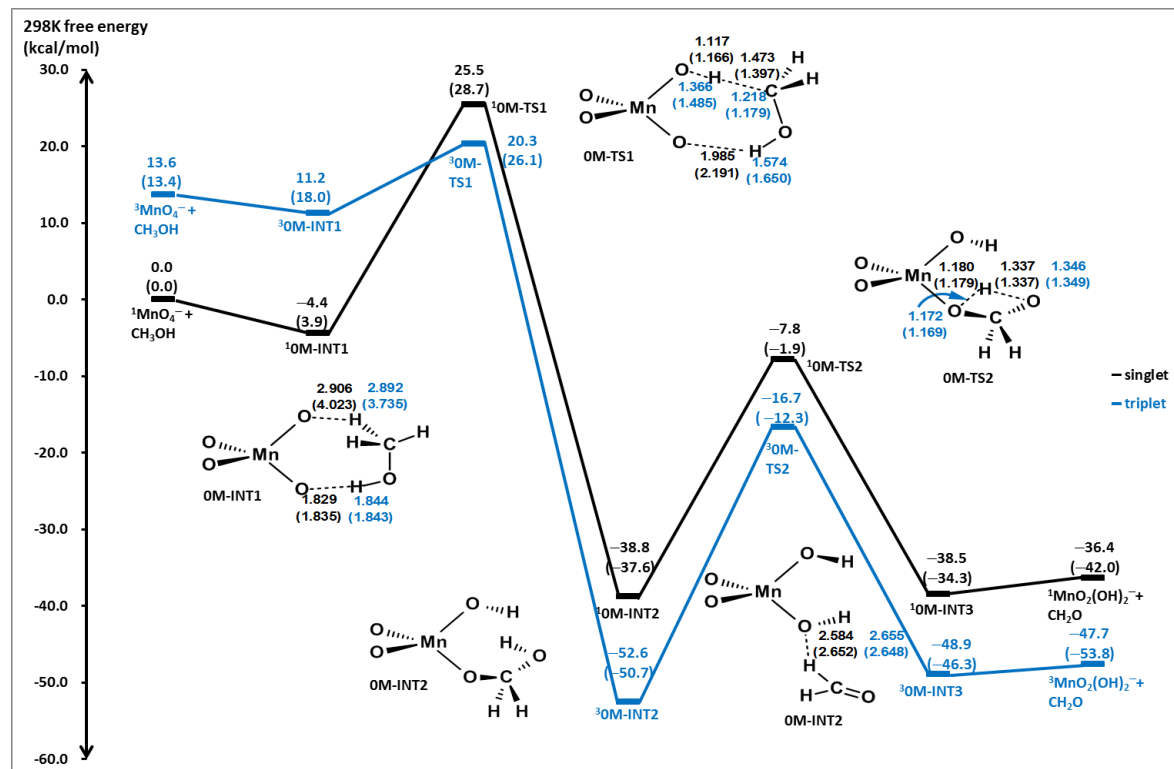



**Scheme S2:** Singlet and triplet potential energy surface for the oxidation of 1-phenylethanol by  $[\text{BF}_3 \cdot \text{MnO}_4]^-$  at B3LYP level using LanL2DZ basis set for transition metal (Mn) and 6-311++G(d,p) basis set for nonmetal atoms. Relative 298 K Gibbs free energies at gas phase and in acetonitrile (in parentheses) are given in kcal/mol.

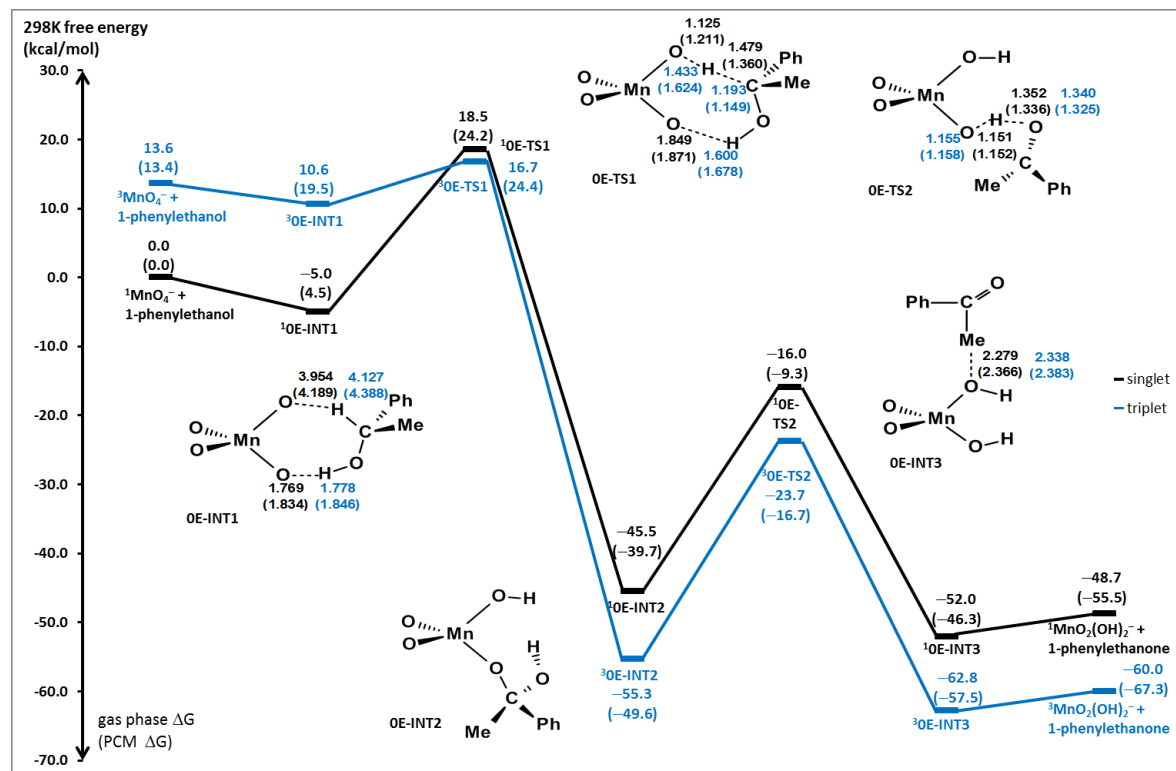

**Scheme S3:** Singlet and triplet potential energy surface for the oxidation of 1-phenylethanol by  $\text{MnO}_4^-$  at B3LYP level using LanL2DZ basis set for transition metal (Mn) and 6-311++G(d,p) basis set for nonmetal atoms. Relative 298 K Gibbs free energies at gas phase and in acetonitrile (in parentheses) are given in kcal/mol.

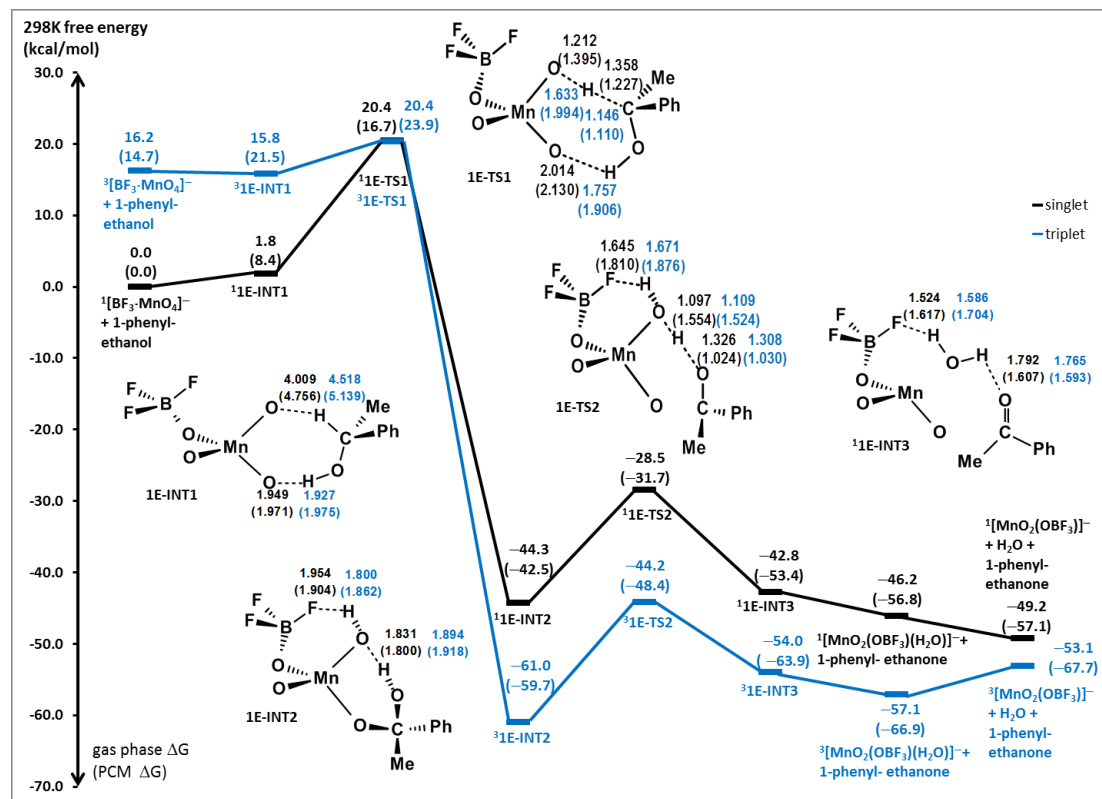

**Table S1:** Bond strength and hydride affinity of alpha C–H bond of alcohols at gas phase and in acetonitrile calculated at B3LYP/6-311++G(d,p) level.

| Alcohol                                                      | C–H bond strength or hydride affinity (kcal/mol) |                          |                          |                          |
|--------------------------------------------------------------|--------------------------------------------------|--------------------------|--------------------------|--------------------------|
|                                                              | Gas phase                                        |                          | Acetonitrile (PCM)       |                          |
|                                                              | $\Delta H_{298}^{\circ}$                         | $\Delta G_{298}^{\circ}$ | $\Delta H_{298}^{\circ}$ | $\Delta G_{298}^{\circ}$ |
| <b>RCH<sub>2</sub>OH → RCHOH + H</b>                         |                                                  |                          |                          |                          |
| benzyl-alcohol                                               | 79.6                                             | 71.7                     | 78.9                     | 71.2                     |
| 1-phenyl-ethanol                                             | 79.6                                             | 70.5                     | 79.4                     | 70.6                     |
| 2-pentanol                                                   | 89.7                                             | 80.8                     | 90.0                     | 81.0                     |
| 2-propanol                                                   | 89.7                                             | 80.9                     | 90.0                     | 81.2                     |
| ethanol                                                      | 91.7                                             | 83.2                     | 91.8                     | 83.3                     |
| methanol                                                     | 93.3                                             | 84.9                     | 93.4                     | 85.1                     |
| cyclohexanol (chair)                                         | 89.7                                             | 81.1                     | 90.0                     | 81.4                     |
| cyclohexanol (boat)                                          | 88.9                                             | 79.8                     | 89.1                     | 80.1                     |
| <b>RCH<sub>2</sub>OH → RCHOH<sup>+</sup> + H<sup>-</sup></b> |                                                  |                          |                          |                          |
| benzyl-alcohol                                               | 227.6                                            | 220.8                    | 182.1                    | 175.3                    |
| 1-phenyl-ethanol                                             | 222.1                                            | 213.9                    | 178.5                    | 170.8                    |
| 2-pentanol                                                   | 230.4                                            | 222.1                    | 179.9                    | 171.7                    |
| 2-propanol                                                   | 234.3                                            | 225.9                    | 181.0                    | 172.6                    |
| ethanol                                                      | 249.5                                            | 241.9                    | 191.3                    | 183.6                    |
| methanol                                                     | 271.1                                            | 263.7                    | 206.4                    | 199.0                    |
| cyclohexanol (chair)                                         | 228.8                                            | 220.6                    | 180.7                    | 172.7                    |
| cyclohexanol (boat)                                          | 225.8                                            | 217.5                    | 177.1                    | 168.9                    |

## References

1. *Purification and Laboratory Chemicals*, ed. D. D. Perrin and W. L. F. Armarego, Pergamon, New York, 3rd edn., 1988.
2. A. D. Beck, *J. Chem. Phys.*, 1993, **98**, 5648.
3. (a) P. J. Hay and W. R. Wadt, *J. Chem. Phys.*, 1985, **82**, 270. (b) P. J. Hay and W. R. Wadt, *J. Chem. Phys.*, 1985, **82**, 284. (c) P. J. Hay and W. R. Wadt, *J. Chem. Phys.*, 1985, **82**, 299.
4. (a) S. Miertuš, E. Scrocco, J. Tomasi, *Chem. Phys.*, 1981, **55**, 117. (b) S. Miertuš and J. Tomasi, *Chem. Phys.*, 1982, **65**, 239.
5. *Gaussian 09, Revision B.1*, M. J. Frisch, G. W. Trucks, H. B. Schlegel, G. E. Scuseria, M. A. Robb, J. R. Cheeseman, G. Scalmani, V. Barone, B. Mennucci, G. A. Petersson, H. Nakatsuji, M. Caricato, X. Li, H. P. Hratchian, A. F. Izmaylov, J. Bloino, G. Zheng, J. L. Sonnenberg, M. Hada, M. Ehara, K. Toyota, R. Fukuda, J. Hasegawa, M. Ishida, T. Nakajima, Y. Honda, O. Kitao, H. Nakai, T. Vreven, Jr. Montgomery, J. A., J. E. Peralta, F. Ogliaro, M. Bearpark, J. J. Heyd, E. Brothers, K. N. Kudin, V. N. Staroverov, R. Kobayashi, J. Normand, K. Raghavachari, A. Rendell, J. C. Burant, S. S. Iyengar, J. Tomasi, M. Cossi, N. Rega, N. J. Millam, M. Klene, J. E. Knox, J. B. Cross, V. Bakken, C. Adamo, J. Jaramillo, R. Gomperts, R. E. Stratmann, O. Yazyev, A. J. Austin, R. Cammi, C. Pomelli, J. W. Ochterski, R. L. Martin, K. Morokuma, V. G. Zakrzewski, G. A. Voth,

P. Salvador, J. J. Dannenberg, S. Dapprich, A. D. Daniels, Ö. Farkas,  
J. B. Foresman, J. V. Ortiz, J. Cioslowski, D. J. Fox, Gaussian, Inc.,  
Wallingford CT, 2009.
